# Supplementary material for: DSCAM gene triplication causes excessive GABAergic synapses in the neocortex in Down syndrome mouse models
Source: PubMed Central journal article supplement (PMC10118173; doi:10.1371/journal.pbio.3002078), 2023-04-20

For Fig 1A

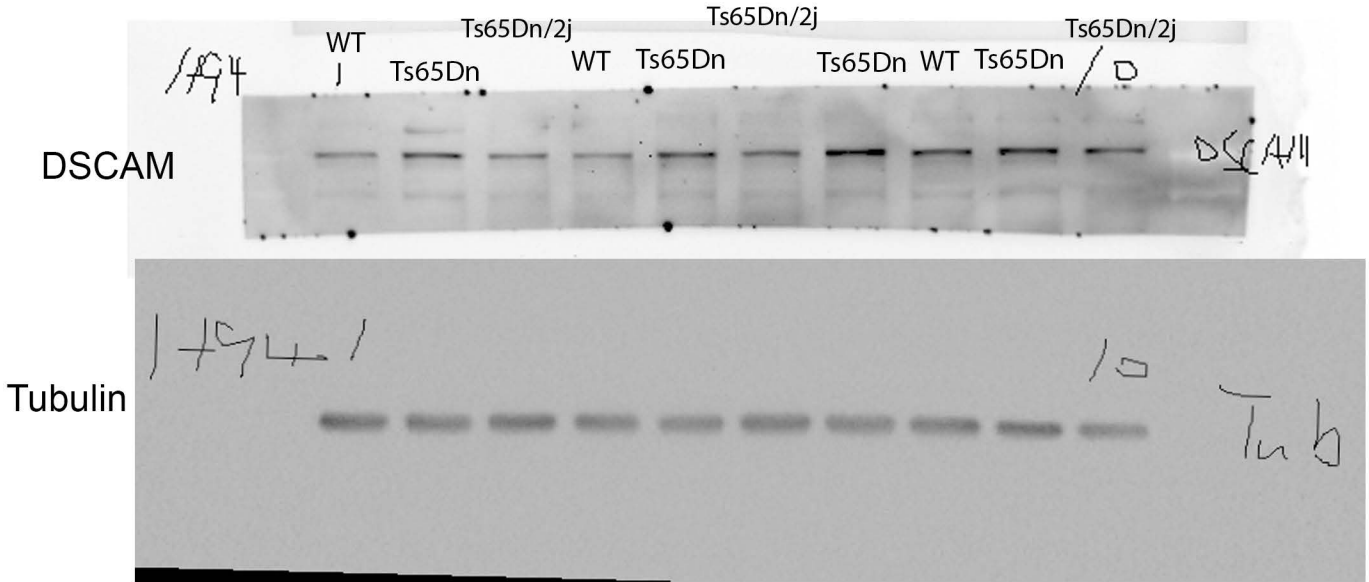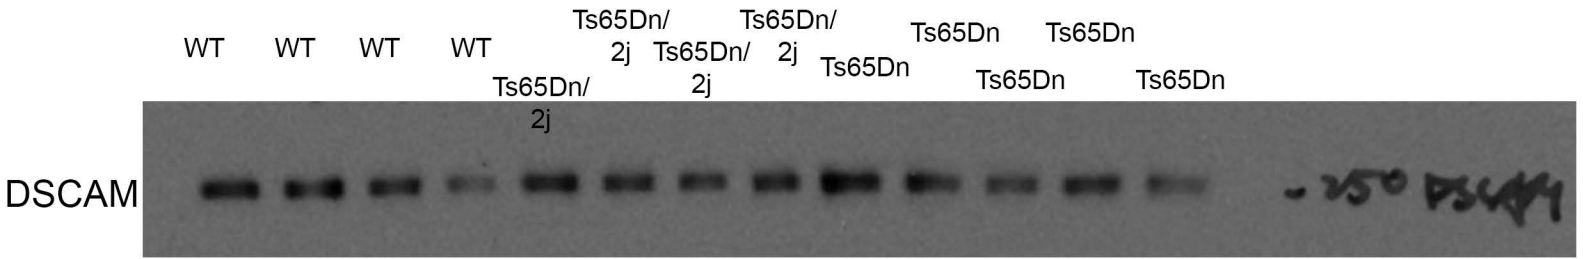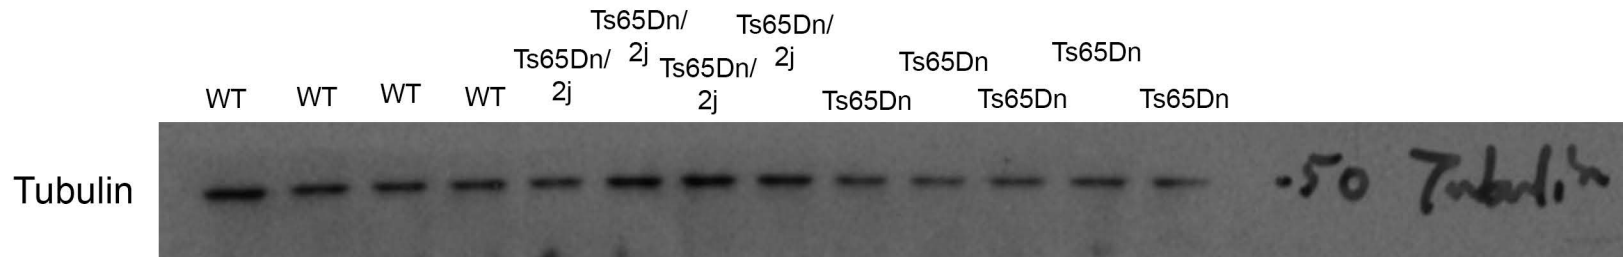

For S1A Fig

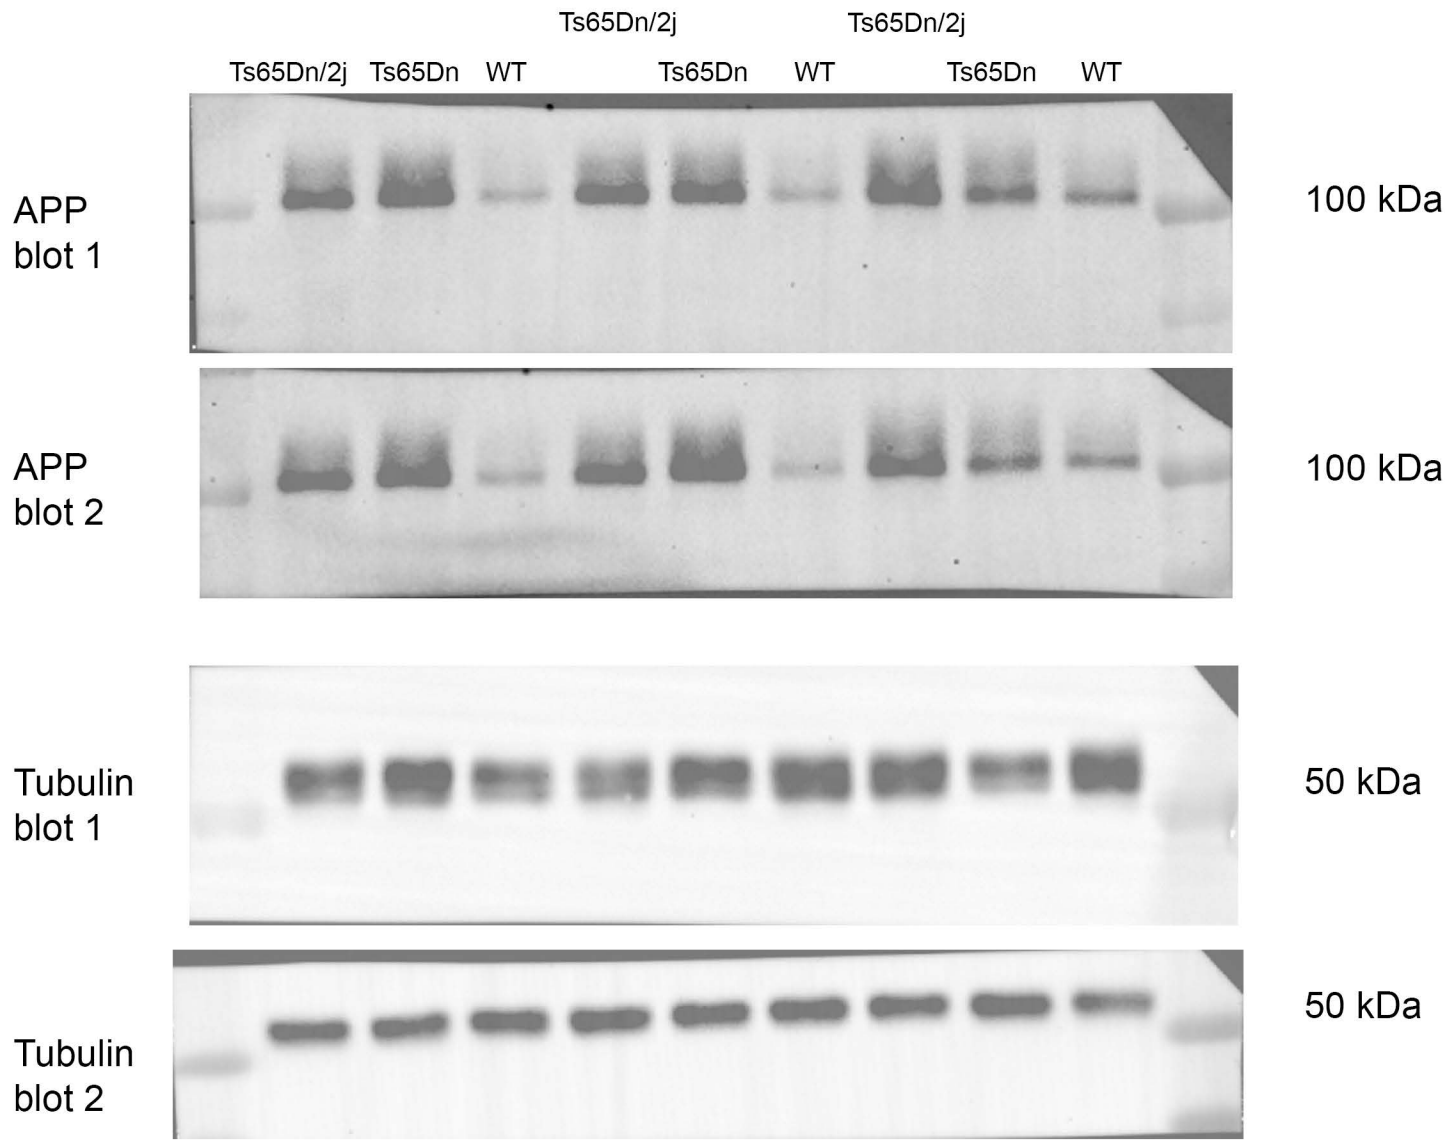

For S8A Fig

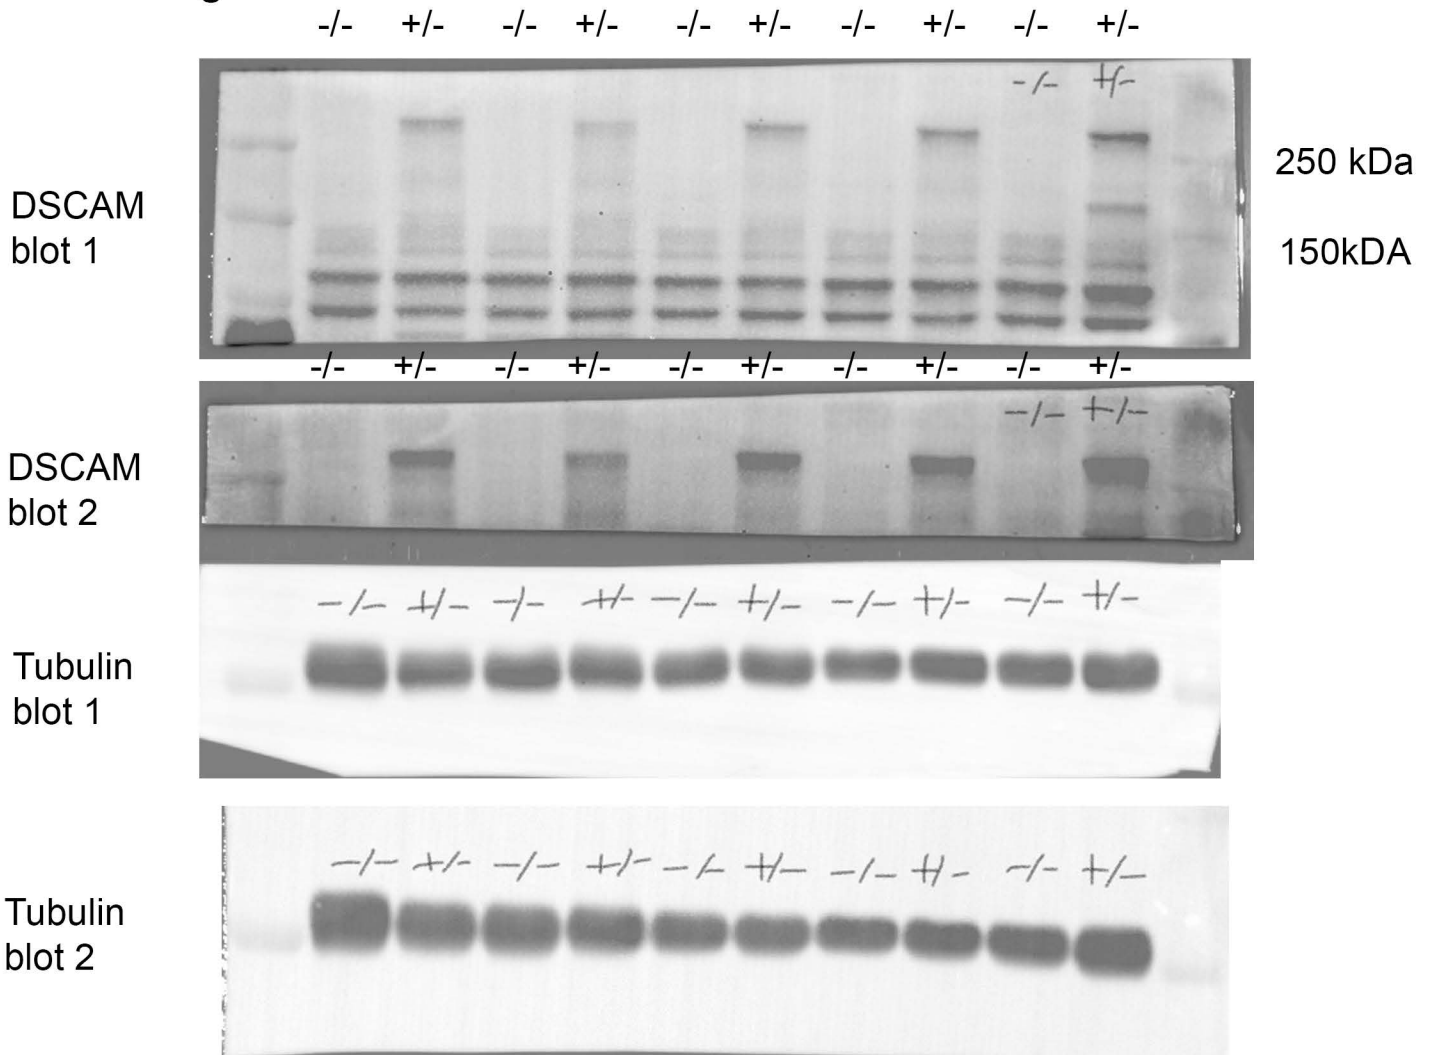

For S8B Fig

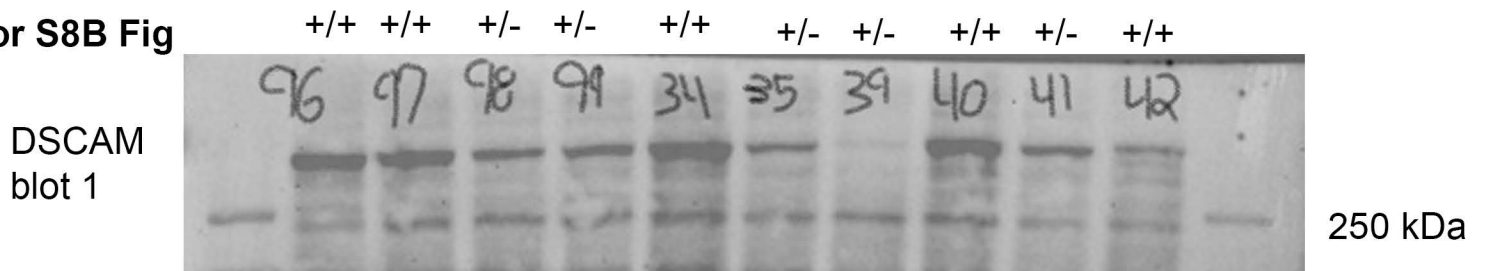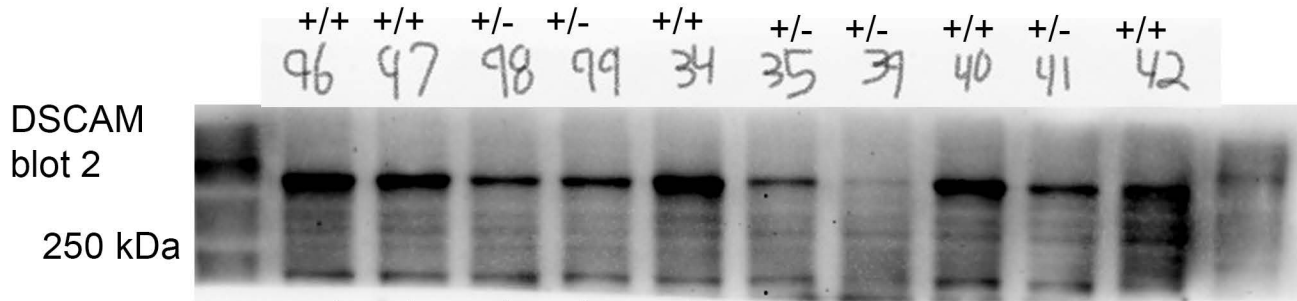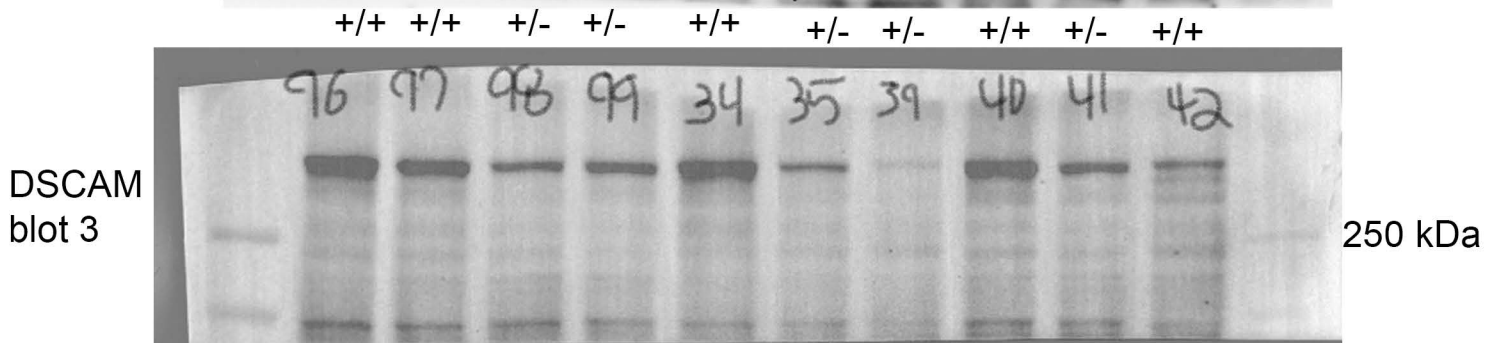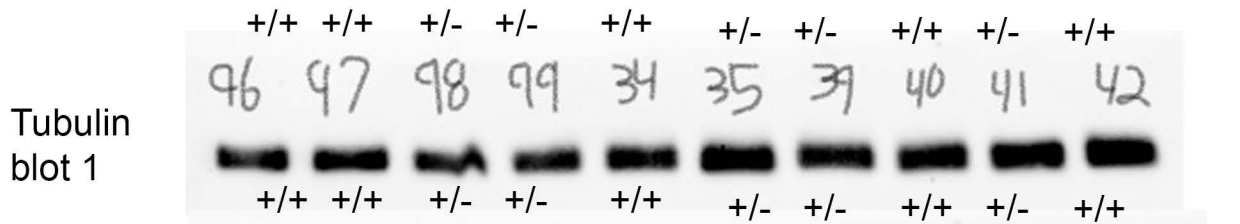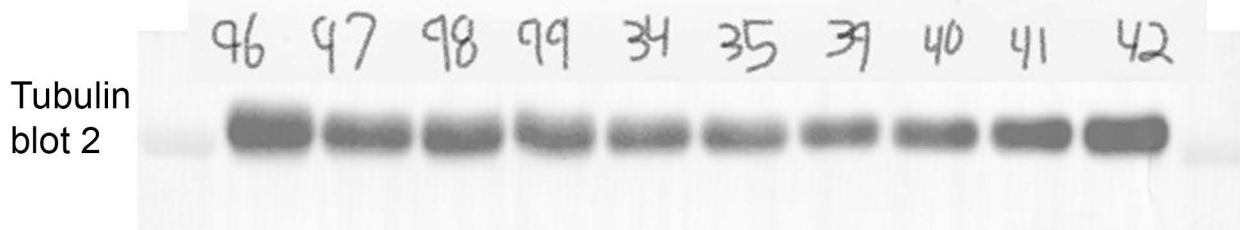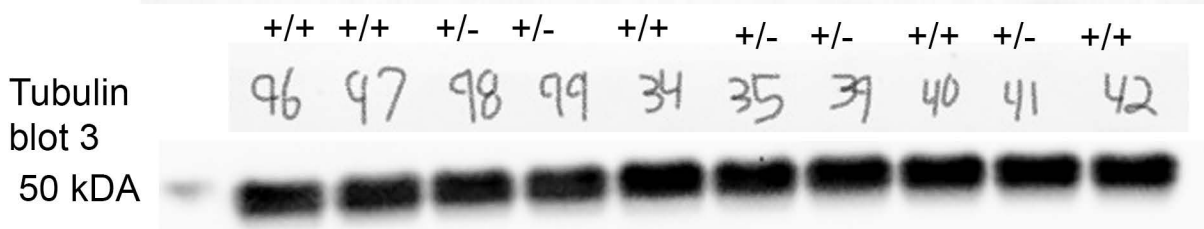

For S10 Fig

WT WT WT WT Ts65Dn/ Ts65Dn/ Ts65Dn Ts65Dn  
2j Ts65Dn/ 2j Ts65Dn Ts65Dn Ts65Dn  
Ts65Dn/ 2j Ts65Dn Ts65Dn Ts65Dn

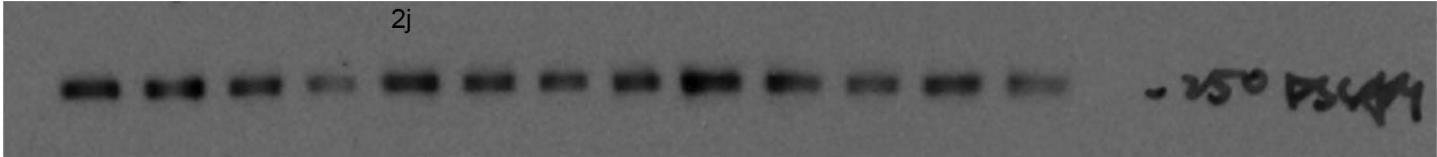

WT WT WT WT Ts65Dn/ Ts65Dn/  
Ts65Dn/ 2j Ts65Dn/ 2j Ts65Dn Ts65Dn  
Ts65Dn Ts65Dn Ts65Dn

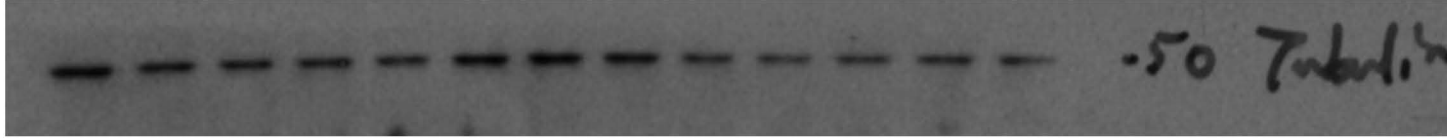

Supplement: pbio.3002078.s012.pdf [file pbio.3002078.s012.pdf]
